# Supplementary material
Source: ML conference proceedings conference paper supplement (https://openreview.net/forum?id=qZgL52USrA)
Supplement: supplementary_material [file attachment]

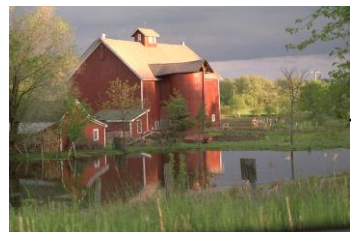

Original Image

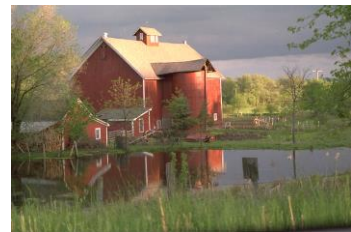

Reconstruction

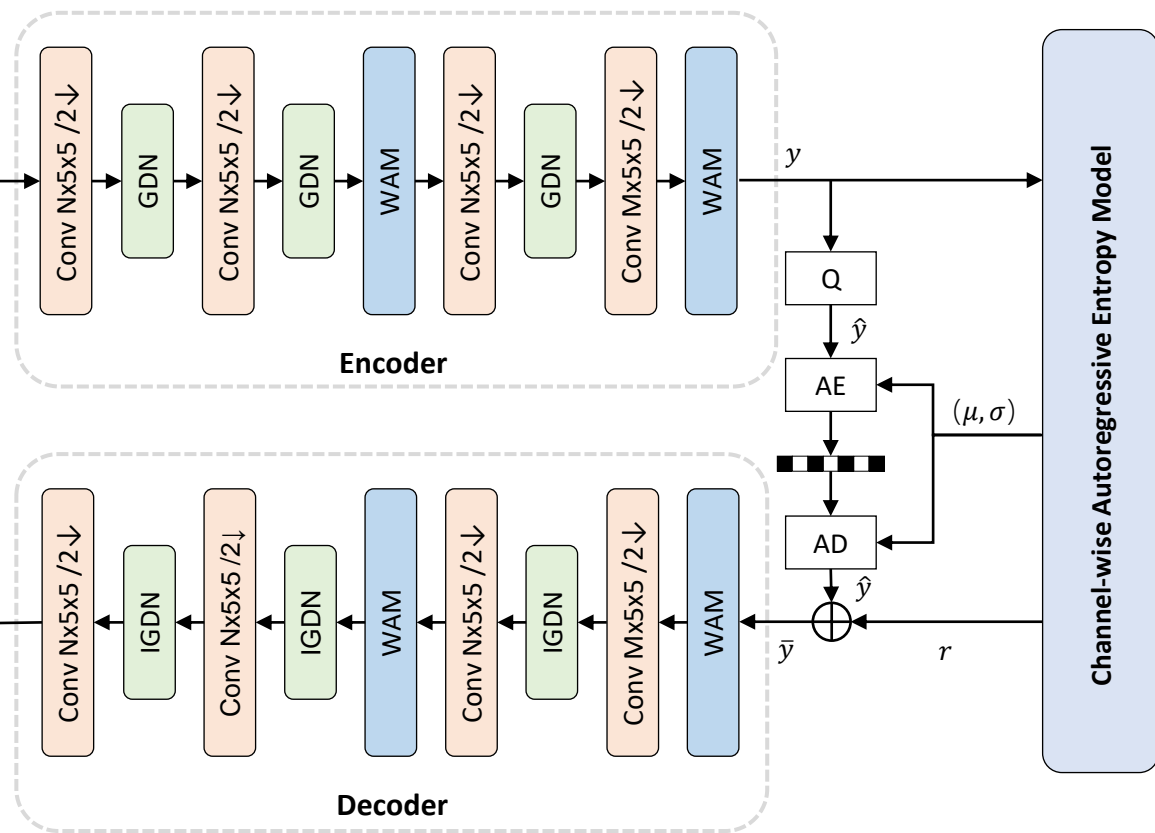

(a) The Architecture of Our CNN-based Model

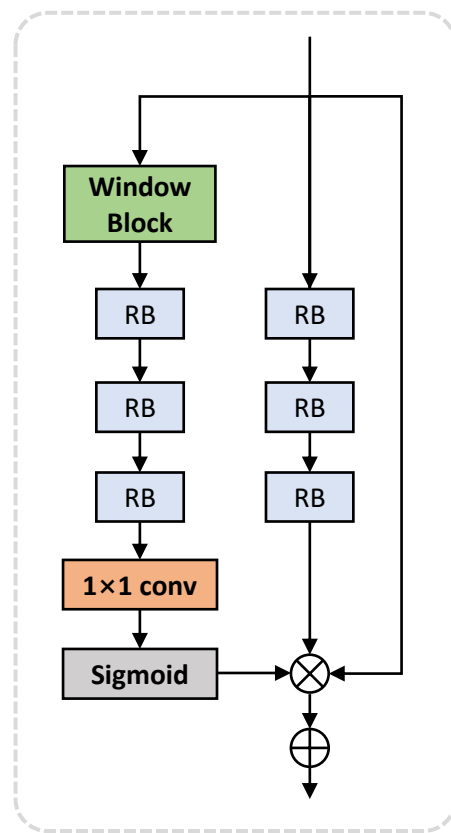

(b) Window Attention Module
